# Supplementary material
Source: Royal Society of Chemistry journal article supplement (doi:10.1039/d6tb00472e)
Supplement: d6tb00472e1.pdf [file d6tb00472e1.pdf]

## *Supporting Information*

# Tumor-targeting Semi-rigid Metal-organic-polymer Framework Nanoparticles with High Adaptability and Bioavailability

Shuxuan Liu<sup>1, 2, §</sup>, Kaiteng Pang<sup>3, §</sup>, Meili Sun<sup>4, §</sup>, Jie Qiao<sup>1, 2</sup>, Hongjing He<sup>1, 2</sup>, Yao Wang<sup>1, 2</sup>, Liqiong Liao<sup>3, \*</sup>, Hao Li<sup>1, 2, \*</sup>, and Guofu Zhou<sup>1, 2</sup>

<sup>1</sup> Guangdong Provincial Key Laboratory of Optical Information Materials and Technology, Institute of Electronic Paper Displays, South China Academy of Advanced Optoelectronics, South China Normal University, Guangzhou 510006, P. R. China

<sup>2</sup> National Center for International Research on Green Optoelectronics, South China Normal University, Guangzhou 510006, P. R. China

<sup>3</sup> Biomaterials Research Center, School of Biomedical Engineering, Southern Medical University, Guangzhou 510515, P.R. China

<sup>4</sup> Department of Radiology, Sun Yat-sen University Cancer Center, State Key Laboratory of Oncology in South China, Collaborative Innovation Center for Cancer Medicine, Sun Yat-sen University, Guangzhou 510050, P. R. China

\* Correspondence should be addressed to:

Professor Hao Li; Tel: +86-20-39314813; Fax: +86-20-39314813

E-mail: haoli@m.scnu.edu.cn

Professor Liqiong Liao; E-mail: liqiongliao@hotmail.com

§These authors contributed equally to this work.

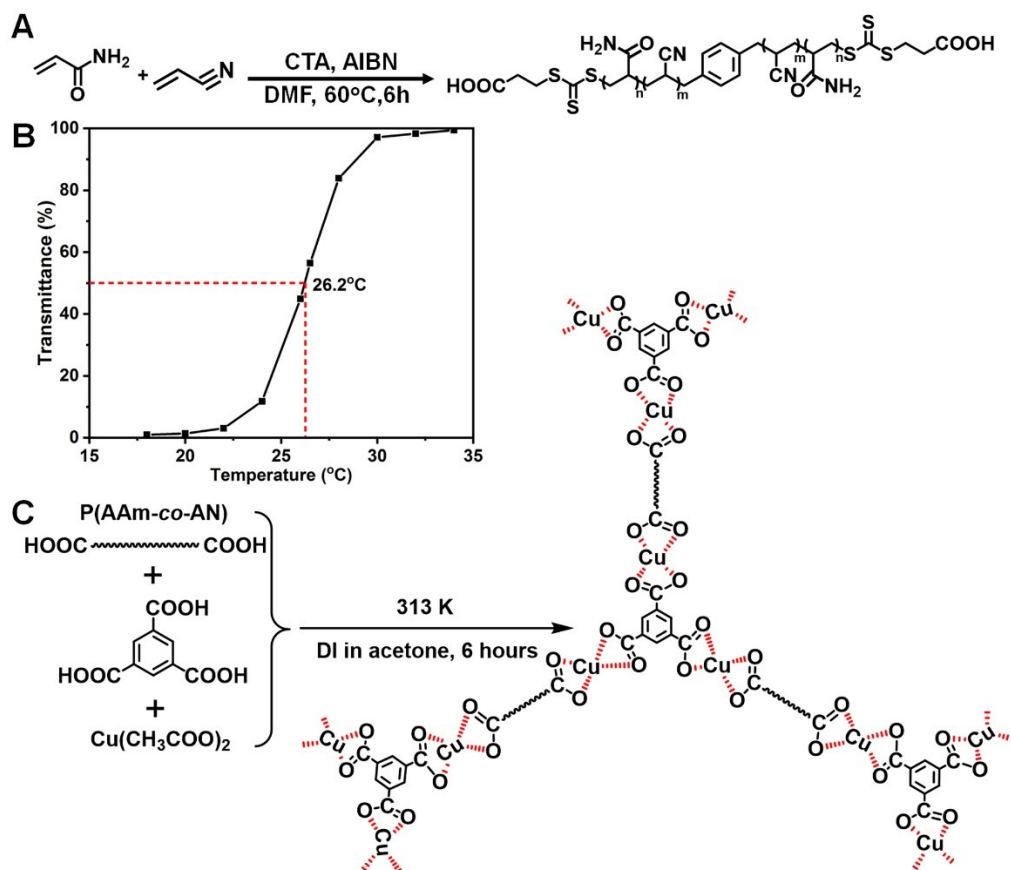

**Figure S1** (A) Synthetic route of random P(AAm-co-AN) copolymer; (B) turbidity profile of the resulting P(AAm-co-AN) copolymer; (C) synthetic route of MOPF.

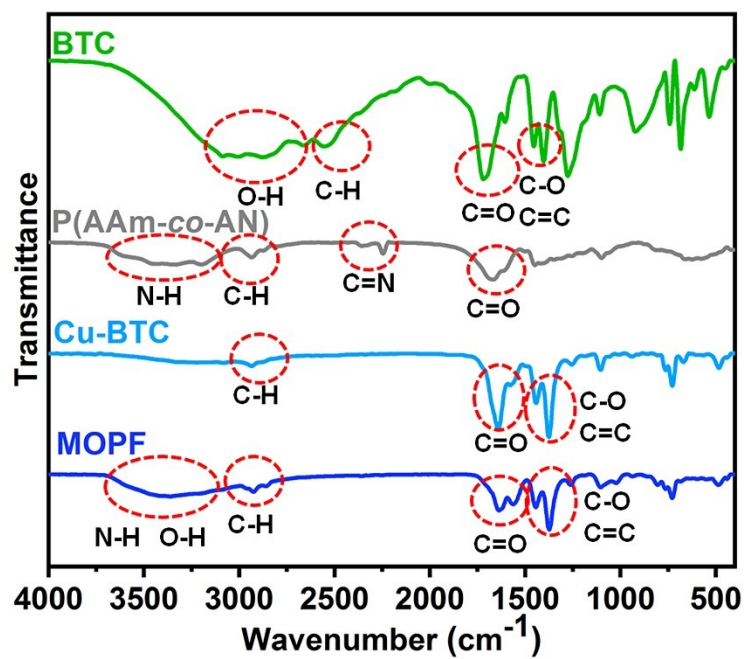

**Figure S2** FT-IR spectra of BTC, P(AAm-co-AN) copolymer, Cu-BTC MOF, and resulting MOPF nanoparticles.

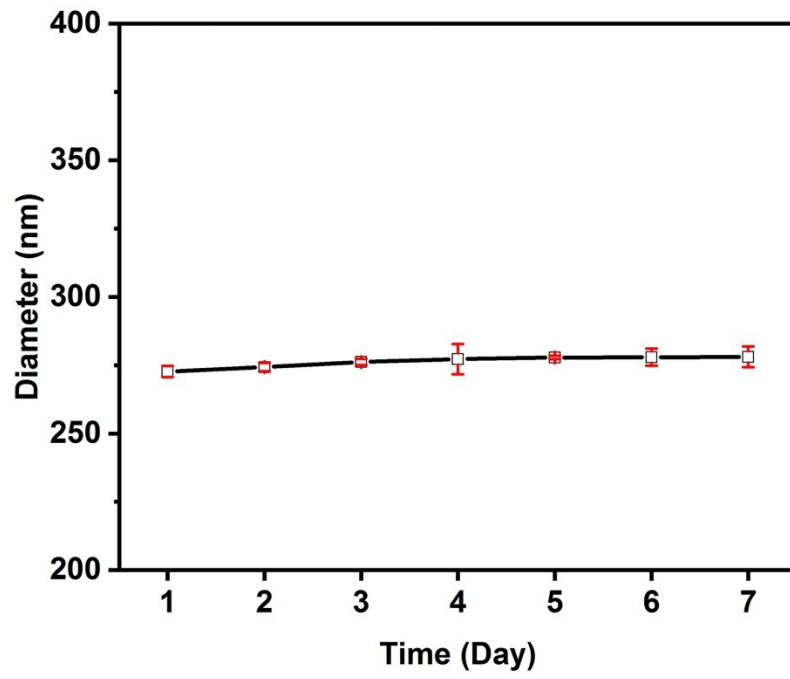

**Figure S3.** Particle sizing variation of the resulting MOPF nanoparticle within a week.

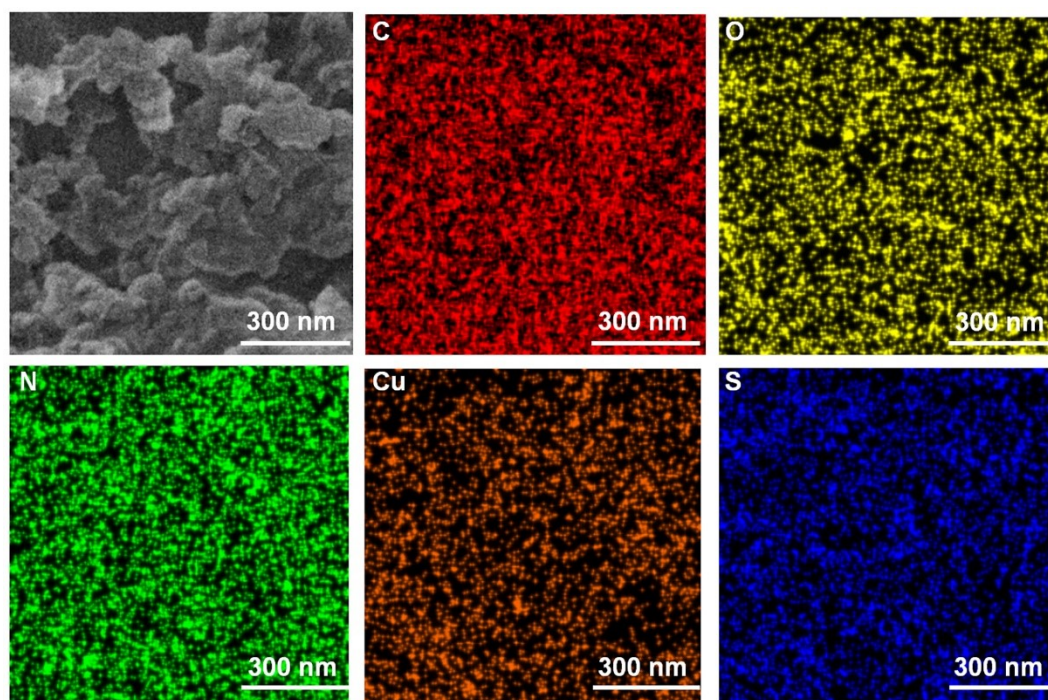

**Figure S4.** EDS elemental mappings of the resulting MOPF nanoparticles.

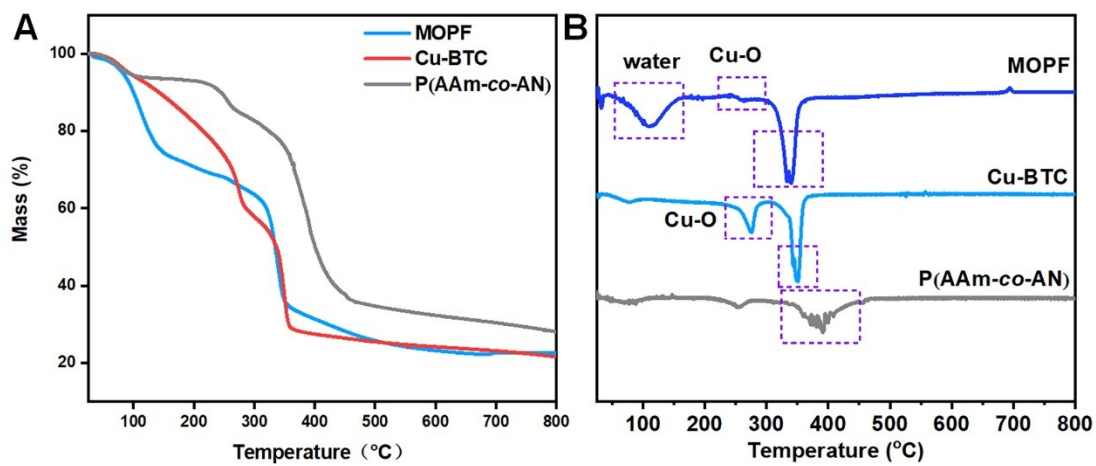

**Figure S5.** (A) TGA curves and (B) the corresponding differential thermogravimetric (DTG) curves of the resulting P(AAm-co-AN) copolymer, Cu-BTC MOF, and MOPF nanoparticles.

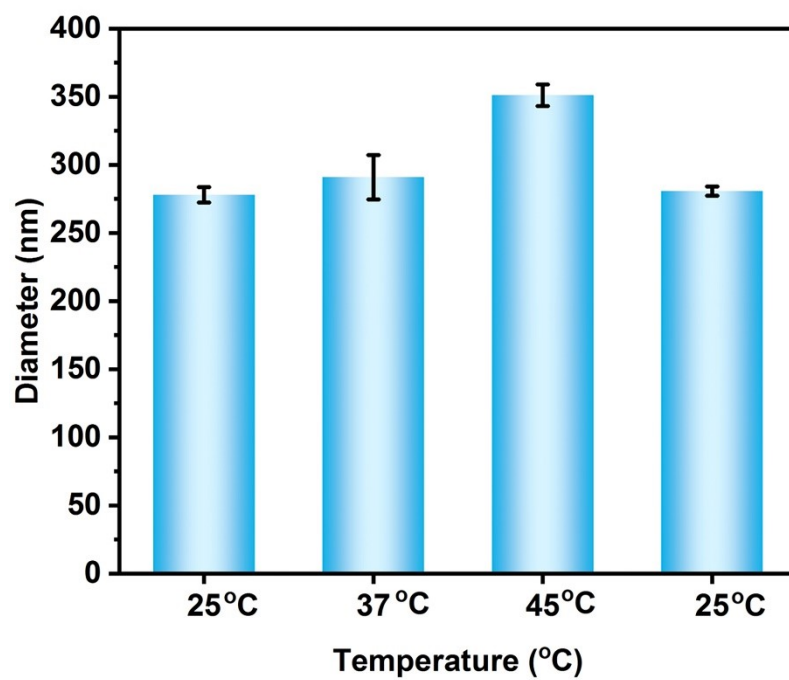

**Figure S6.** Particle sizing variations of the resulting MOPF nanoparticles in deionized water (concentration: 0.05 mg/mL) at different temperatures.

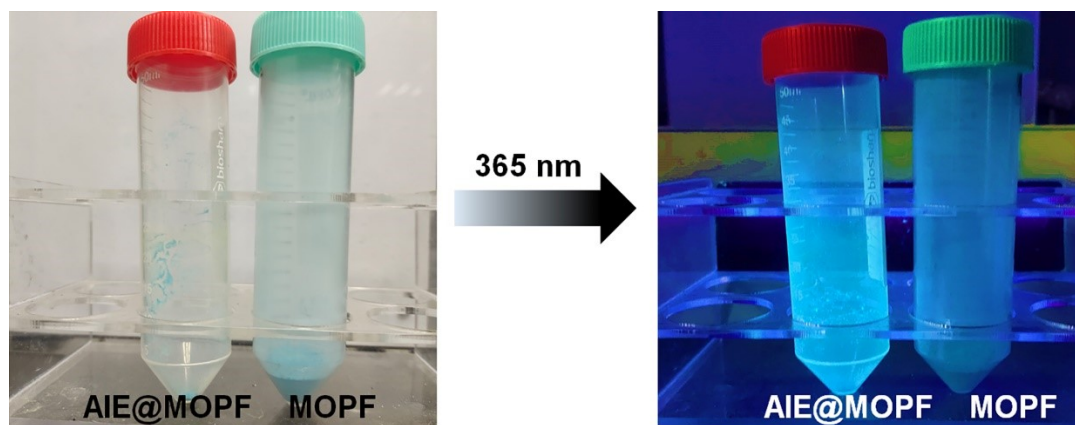

**Figure S7.** Blank and TPE-loaded MOPF nanoparticles (AIE@MOPF) before and after UV irradiation (365 nm).

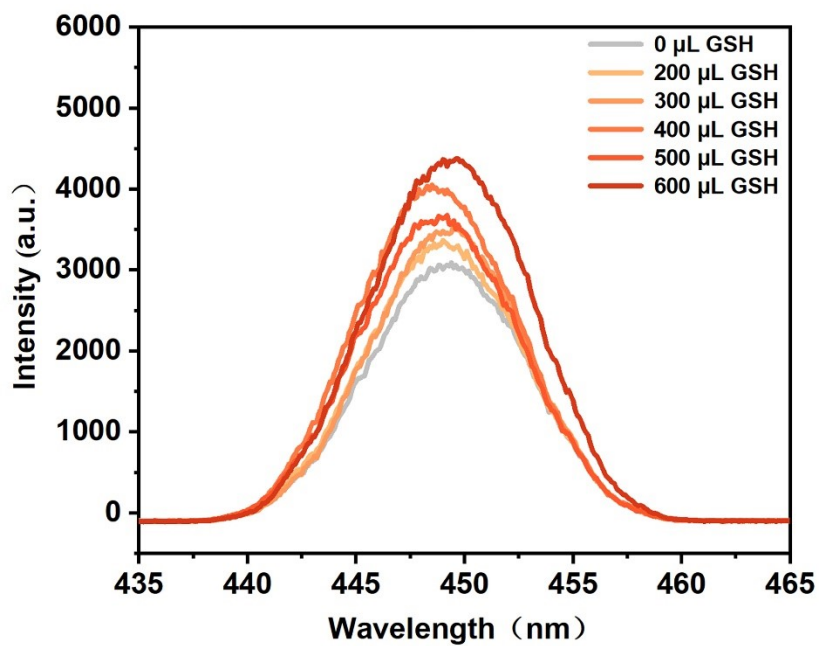

**Figure S8.** Fluorescence spectra of the aqueous MOPF solution (concentration: 1000 mg/mL) after adding different volume of aqueous GSH solution (concentration: 5 mM) and aqueous DTNB solution (concentration: 5 mM) in turn in the wavelength range between 435 and 465 nm.

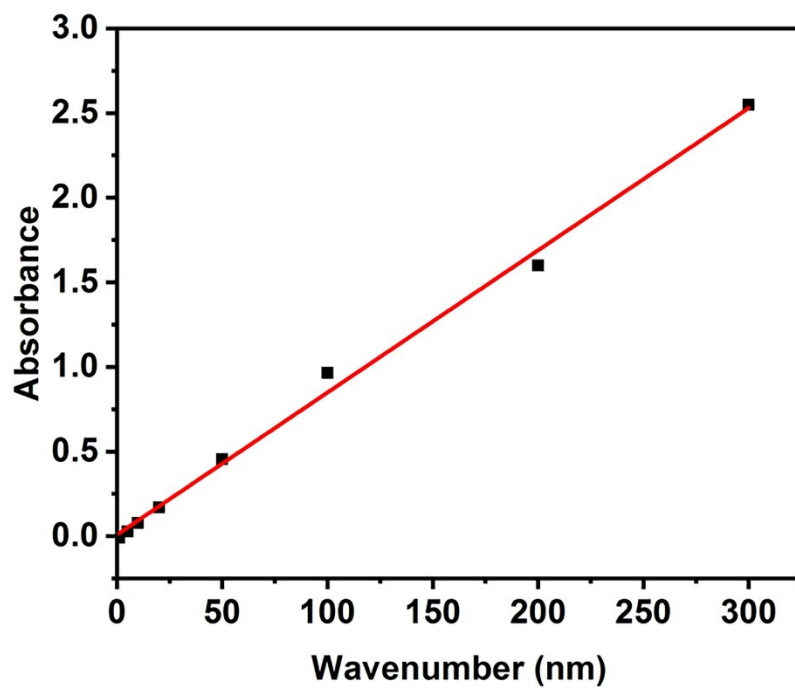

**Figure S9.** Standard absorbance-concentration curve of lenalidomide (LE) in ethyl acetate at 306 nm.

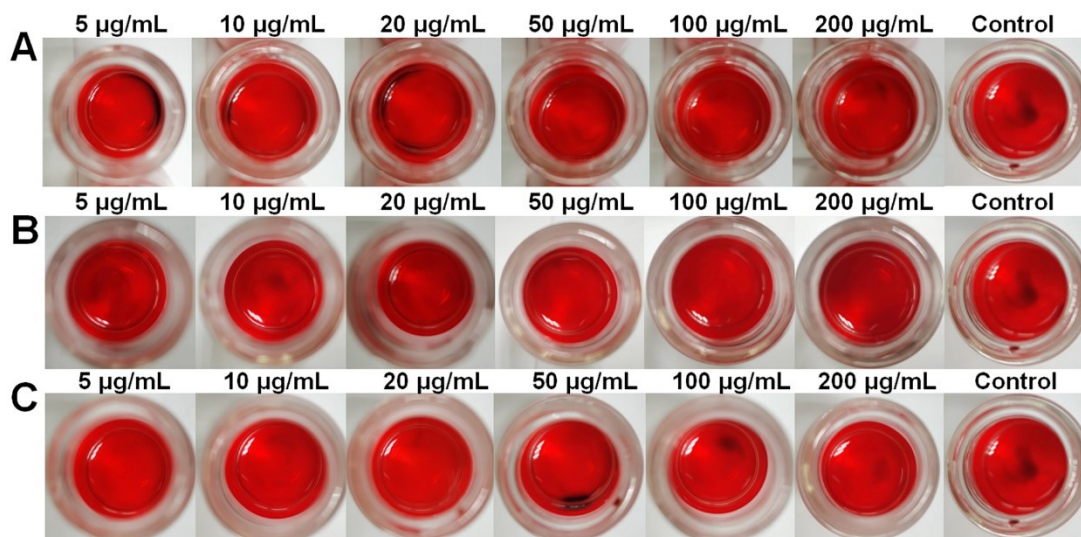

**Figure S10.** Anticoagulation tests for a series of the normal saline solutions of the resulting MOPF nanoparticles (A), LE@MOPF nanoparticles (B) and LE (C) with different concentrations.

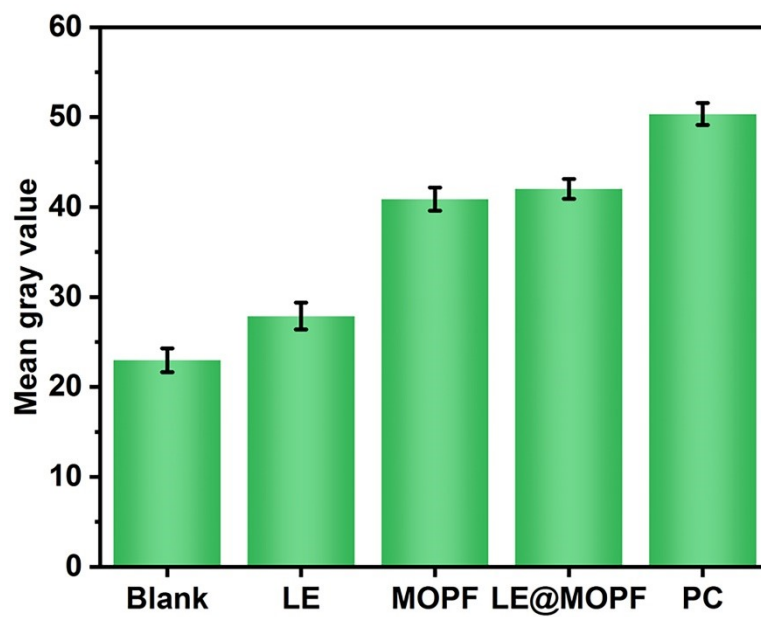

**Figure S11.** ROS generation levels of the DMEM solution: blank, the resulting MOPF nanoparticles (concentration: 200  $\mu\text{g}/\text{mL}$ ), LE@MOPF nanoparticles (concentration: 200  $\mu\text{g}/\text{mL}$ ), LE (concentration: 200  $\mu\text{g}/\text{mL}$ ) and positive control group.

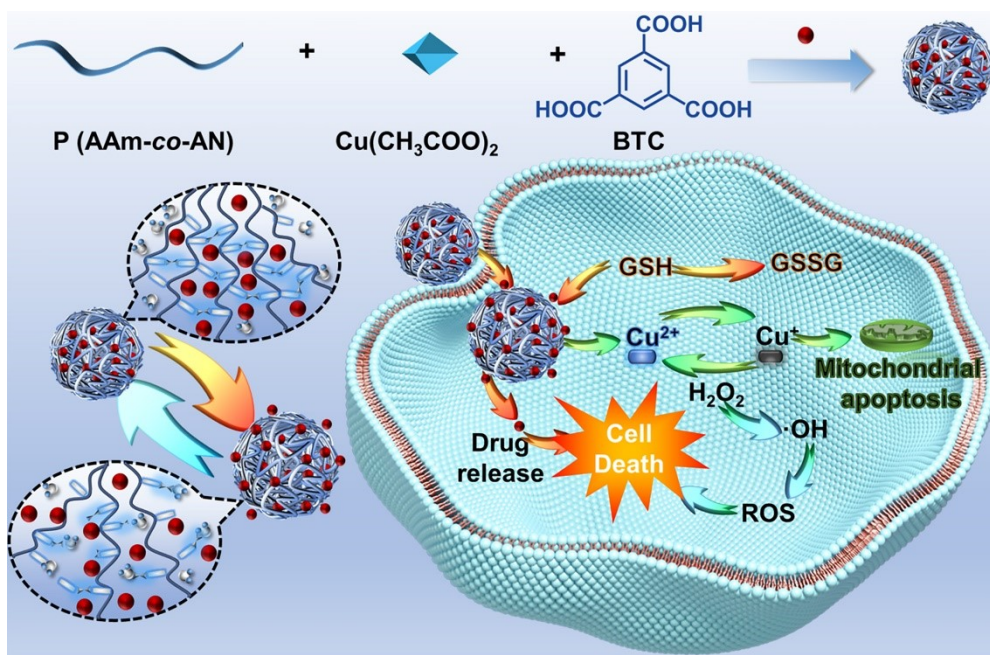

TOC
